# Supplementary material
Source: PubMed Central journal article supplement (PMC4774245)
Supplement: NIHMS760972-supplement-supplement.pdf [file NIHMS760972-supplement-supplement.pdf]

# SUPPLEMENTAL INFORMATION

*Quantifying penetrance in a dominant disease gene  
using large population control cohorts*

|    |                                                                                                 |           |
|----|-------------------------------------------------------------------------------------------------|-----------|
| 1  |                                                                                                 |           |
| 2  |                                                                                                 |           |
| 3  |                                                                                                 |           |
| 4  |                                                                                                 |           |
| 5  |                                                                                                 |           |
| 6  | <b>Table of Contents</b>                                                                        |           |
| 7  | <b>Supplementary Discussion .....</b>                                                           | <b>2</b>  |
| 8  | <b>Additional variants .....</b>                                                                | <b>2</b>  |
| 9  | <b>Dominant versus allelic models .....</b>                                                     | <b>3</b>  |
| 10 | <b>Table S1. Allele counts of rare <i>PRNP</i> variants in 16,025 definite and probable</b>     |           |
| 11 | <b>prion disease cases in 9 countries.....</b>                                                  | <b>4</b>  |
| 12 | <b>Table S2. Rare <i>PRNP</i> variants reported in peer-reviewed literature to cause prion</b>  |           |
| 13 | <b>disease .....</b>                                                                            | <b>7</b>  |
| 14 | <b>Table S3. Allele counts of rare <i>PRNP</i> variants in 60,706 individuals in ExAC. ....</b> | <b>9</b>  |
| 15 | <b>Table S4. Summary of rare <i>PRNP</i> variants by functional class in ExAC .....</b>         | <b>13</b> |
| 16 | <b>Table S5. Allele counts of 16 reportedly pathogenic <i>PRNP</i> variants in &gt;500,000</b>  |           |
| 17 | <b>23andMe research participants.....</b>                                                       | <b>13</b> |
| 18 | <b>Table S6. Phenotypes investigated in studies in which ExAC individuals with</b>              |           |
| 19 | <b>reportedly pathogenic <i>PRNP</i> variants were ascertained.....</b>                         | <b>15</b> |
| 20 | <b>Table S7. Inferred ancestry and codon 129 genotypes of ExAC individuals with</b>             |           |
| 21 | <b>reportedly pathogenic variants.....</b>                                                      | <b>15</b> |
| 22 | <b>Table S8. Inferred ancestry of all ExAC individuals.....</b>                                 | <b>16</b> |
| 23 | <b>Table S9. Inferred ancestry of 23andMe research participants .....</b>                       | <b>17</b> |
| 24 | <b>Table S10. Details of Japanese prion disease cases .....</b>                                 | <b>18</b> |
| 25 | <b>Table S11. Phenotypes of individuals with N-terminal PrP truncating variants ....</b>        | <b>20</b> |
| 26 | <b>Figure S1. Age of ExAC individuals with reportedly pathogenic <i>PRNP</i> variants</b>       |           |
| 27 | <b>versus all individuals in ExAC. ....</b>                                                     | <b>21</b> |
| 28 | <b>Figure S2. Sanger sequencing results for individuals with N-terminal truncating</b>          |           |
| 29 | <b>variants.....</b>                                                                            | <b>22</b> |
| 30 | <b>Figure S2A. G20Gfs84X .....</b>                                                              | <b>22</b> |
| 31 | <b>Figure S2B. R37X .....</b>                                                                   | <b>23</b> |
| 32 | <b>Figure S2C. Q75X.....</b>                                                                    | <b>23</b> |
| 33 | <b>Supplementary references .....</b>                                                           | <b>24</b> |

34

35

## 36 **Supplementary Discussion**

37

### 38 **Additional variants**

39

40 Of the 63 reportedly pathogenic variants (Table S2), 10 are discussed in the main text. Of those  
41 10, our data and our analysis of the literature indicate high penetrance for 4 (P102L, A117V,  
42 D178N, and E200K), intermediate penetrance for 3 (V180I, V210I, and M232R), and suggest  
43 that 3 others may be benign (P39L, E196A, and R208C). In this section we discuss four  
44 additional variants that we cannot conclusively reclassify but which are unlikely to be highly  
45 penetrant, and we also provide a brief discussion of interpretation for remaining variants.

46

47 **R148H** has been reported in a two isolated patients with a sporadic Creutzfeldt-Jakob disease  
48 phenotype and negative family history (1, 2) and appears one additional time in our case  
49 cohorts (Table S1). Based on its rarity in cases, lack of familial segregation and presence on 3  
50 alleles in ExAC, it is unlikely to be a highly penetrant Mendelian variant. It might be benign or it  
51 might slightly increase prion disease risk.

52

53 **T188R** has been reported in two cases in the literature. One German individual presented with a  
54 sporadic Creutzfeldt-Jakob disease phenotype but no autopsy was performed; family history  
55 was negative (3, 4). One Mexican-American individual had autopsy-confirmed prion disease and  
56 an ambiguous family history(5). This variant appears 12 times in our case cohort (all in the  
57 United States) and 3 times in ExAC (all in Latino populations). Based on its allele frequency in  
58 controls, rarity in cases and lack of any clear evidence for segregation in families, T188R is  
59 unlikely to be a highly penetrant Mendelian disease variant. It is not clear whether it is benign or  
60 increases prion disease risk.

61

62 **V203I** has been reported in three heterozygous patients - one Italian (6), one Korean (7), and  
63 one Chinese (8), as well as in one Japanese homozygote (9). Family history is negative in all of  
64 these reported patients as well as in two additional V203I cases in our Japanese case cohort  
65 (Table S10). In our cohorts, this variant appears in a total of 16 cases from several countries; in  
66 ExAC, it appears in 3 European individuals. Based on its allele frequency in controls, rarity in  
67 cases and lack of any clear evidence for segregation in families, V203I is unlikely to be a highly  
68 penetrant Mendelian disease variant, and could be benign or could increase prion disease risk.  
69 The report of prion disease in a V203I homozygote makes us slightly inclined to favor the  
70 interpretation that V203I does increase prion disease risk.

71

72 **R208H** has been reported in several isolated cases of varied ancestries, all with a negative  
73 family history (10–16). In our cohorts, it appears in 13 prion disease cases, 9 ExAC individuals  
74 and 22 individuals in the 23andMe database. Given its high frequency in controls, this variant  
75 may be benign or may slightly increase prion disease risk.

76

77 **Other variants.** Excluding variants discussed in the main text and above, 0.8% (87 / 10460) of  
78 individuals in our case series harbor other rare *PRNP* missense variants, some of which have  
79 been reported as pathogenic (Table S2) and others of which have not. Because most of these  
80 variants are very rare both in cases and in population controls, comparisons of case and control  
81 allele frequency are not well powered to evaluate the pathogenicity of most individual variants.  
82 Collectively, our data indicate that this category includes at least some variants that increase  
83 prion disease risk, because only 0.3% (187 / 60706) of ExAC individuals harbor a rare missense  
84 variant other than those discussed in the main text or above, whereas 0.8% (87 / 10460) of  
85 prion disease cases harbor one of these variants, a significant enrichment ( $p = 1 \times 10^{-12}$ , Fisher's  
86 exact test). Indeed, Mendelian segregation has been demonstrated for some of these variants,  
87 such as T183A and F198S (17, 18). However, the fact that, in the aggregate, we observe only  
88 modest (~3-fold) enrichment of such variants in cases versus controls suggests that this  
89 category also includes many neutral or very low-risk variants, consistent with our expectation  
90 that sporadic prion disease cases should, by chance, harbor some rare variants unassociated  
91 with disease. We also cannot exclude the possibility that some specific rare variants, particularly  
92 those observed in controls and not in cases, could be protective.

93

94 **Future novel missense variants.** Additional novel missense variants in *PRNP* are sure to be  
95 observed in prion disease patients in the future. Our findings that some reportedly pathogenic  
96 variants are either benign or exhibit low penetrance, together with our observation that ~4 in  
97 1000 controls harbor a rare *PRNP* missense variant, urge caution in the interpretation of novel  
98 variants in prion disease patients. This is consistent with current guidelines (19, 20), which  
99 indicate that novel protein-altering variants, even in established disease genes, should not be  
100 assumed to be causal or highly penetrant until evidence, such as Mendelian segregation, or  
101 significant enrichment in cases over controls, can be established.

## 102 **Dominant versus allelic models**

103

104 Virtually all patients ever reported with genetic prion disease have been heterozygous for the  
105 putative pathogenic variants. Five individuals homozygous for E200K (21) were reported to  
106 have a younger age of onset than heterozygotes (mean 50 vs. 59 years,  $p = .03$ ), suggesting  
107 some degree of codominance. There have been individual case reports of homozygotes for  
108 Q212P (22) and V203I (9), both without a family history among heterozygote relatives, which  
109 might suggest that dosage of the mutant allele is important. We are not aware of any other  
110 reports of individuals homozygous for potentially pathogenic variants in *PRNP*. Regardless of  
111 whether a dominant or allelic model is assumed, our formula for lifetime risk (Materials and  
112 Methods) gives identical point estimates of penetrance and virtually identical 95% confidence  
113 intervals.

114

115 **Table S1. Allele counts of rare *PRNP* variants in 16,025 definite and**  
 116 **probable prion disease cases in 9 countries.**

117  
 118 Abbreviations: OPRD, octapeptide repeat deletion; OPRI, octapeptide repeat insertion. \*V203I  
 119 in Japan: two heterozygotes and one homozygote, four alleles total. All other individuals are  
 120 heterozygotes.  
 121

| Country                                         | Australia | France | Germany | Italy | Japan | Netherlands | Spain | U.K. | U.S. | TOTAL |
|-------------------------------------------------|-----------|--------|---------|-------|-------|-------------|-------|------|------|-------|
| <b>Start year</b>                               | 1993      | 1991   | 1993    | 1993  | 1999  | 1993        | 1993  | 1990 | 2000 |       |
| <b>End year</b>                                 | 2014      | 2013   | 2015    | 2013  | 2014  | 2013        | 2013  | 2013 | 2014 |       |
| <b>Definite plus probable cases</b>             | 553       | 2383   | 2690    | 1684  | 2144  | 409         | 1280  | 1963 | 2919 | 16025 |
| <b>Of which PRNP sequenced</b>                  | 152       | 1774   | 1307    | 1054  | 1533  | 163         | 749   | 1088 | 2640 | 10460 |
| <b>Proportion sequenced</b>                     | 27%       | 74%    | 49%     | 63%   | 72%   | 40%         | 59%   | 55%  | 90%  | 65%   |
| <b>Cumulative allele count of rare variants</b> | 31        | 196    | 125     | 396   | 464   | 22          | 127   | 173  | 361  | 1895  |
| <b>2-OPRD</b>                                   |           |        |         |       |       | 3           |       |      |      | 3     |
| <b>1-OPRI</b>                                   |           | 2      | 1       |       |       |             |       |      | 4    | 7     |
| <b>2-OPRI</b>                                   |           |        |         |       |       |             | 1     |      | 5    | 6     |
| <b>3-OPRI</b>                                   |           | 1      | 1       |       |       |             |       |      |      | 2     |
| <b>4-OPRI</b>                                   |           | 1      | 3       |       |       |             | 2     | 13   | 4    | 23    |
| <b>5-OPRI</b>                                   |           | 2      | 10      |       |       | 1           | 1     | 13   | 12   | 39    |
| <b>6-OPRI</b>                                   |           | 2      |         |       |       |             |       | 35   | 15   | 52    |
| <b>7-OPRI</b>                                   |           | 1      | 1       |       |       | 1           |       | 2    |      | 5     |
| <b>8-OPRI</b>                                   |           | 10     |         |       |       |             |       |      |      | 10    |
| <b>9-OPRI</b>                                   |           |        |         |       |       |             |       |      | 4    | 4     |
| <b>10-OPRI</b>                                  |           |        |         |       |       |             |       | 1    |      | 1     |
| <b>OPRI (length)</b>                            |           |        |         | 9     | 8     |             |       |      |      | 17    |

|              |   |    |    |    |     |   |    |    |    |     |
|--------------|---|----|----|----|-----|---|----|----|----|-----|
| unspecified) |   |    |    |    |     |   |    |    |    |     |
| A2V          |   |    | 1  |    |     |   |    |    |    | 1   |
| G54S         |   |    |    |    |     |   |    | 1  | 4  | 5   |
| P84S         |   |    |    |    |     |   |    | 1  |    | 1   |
| G88A         |   |    |    |    |     |   | 1  |    |    | 1   |
| G94S         |   |    |    |    |     |   |    |    | 1  | 1   |
| H96Y         |   |    |    |    |     |   | 1  |    |    | 1   |
| P102L        | 2 | 10 | 7  | 59 | 83  |   | 1  | 34 | 25 | 221 |
| P105L        |   |    |    |    | 12  |   |    | 1  |    | 13  |
| P105S        |   |    |    |    |     |   |    |    | 1  | 1   |
| P105T        | 3 |    | 2  |    |     |   |    |    |    | 5   |
| G114V        |   |    |    |    |     |   |    |    | 1  | 1   |
| A117V        |   | 3  |    |    |     | 8 | 1  | 12 | 9  | 33  |
| G131V        |   |    |    |    |     | 1 |    |    |    | 1   |
| S132I        |   |    |    |    |     |   |    | 1  |    | 1   |
| A133V        | 1 |    |    |    |     |   |    |    | 1  | 2   |
| R148H        |   |    | 1  |    |     |   |    |    | 2  | 3   |
| Q160X        |   |    |    |    |     |   |    |    | 1  | 1   |
| Y163X        |   |    |    |    |     |   |    | 2  |    | 2   |
| D167G        |   |    |    |    |     |   |    | 1  |    | 1   |
| V176G        | 1 |    |    |    |     |   |    |    |    | 1   |
| D178N        | 3 | 34 | 32 | 18 | 5   | 4 | 65 | 12 | 36 | 209 |
| V180I        |   | 1  |    | 1  | 218 |   |    |    | 5  | 225 |
| T183A        |   |    |    |    |     |   |    |    | 3  | 3   |
| Q186X        |   |    |    |    |     |   |    |    | 1  | 1   |
| H187A        |   |    |    |    |     |   |    |    | 1  | 1   |
| H187R        |   |    |    |    |     |   |    |    | 7  | 7   |
| T188A        | 1 |    |    |    |     |   |    |    |    | 1   |

|                                  |    |     |    |     |    |   |    |    |     |     |
|----------------------------------|----|-----|----|-----|----|---|----|----|-----|-----|
| <b>T188K</b>                     |    |     | 2  |     |    |   |    |    | 1   | 3   |
| <b>T188R</b>                     |    |     |    |     |    |   |    |    | 12  | 12  |
| <b>E196A</b>                     |    |     |    |     |    |   |    |    | 1   | 1   |
| <b>E196K</b>                     |    | 3   | 8  | 2   |    |   |    |    |     | 13  |
| <b>F198S</b>                     |    |     |    |     |    |   |    |    | 5   | 5   |
| <b>E200G</b>                     |    |     |    |     |    |   |    |    | 1   | 1   |
| <b>E200K</b>                     | 11 | 101 | 28 | 123 | 63 | 2 | 52 | 38 | 153 | 571 |
| <b>V203I</b>                     |    | 5   |    | 3   | 4* |   |    |    | 5   | 17  |
| <b>R208H</b>                     |    | 1   | 2  | 7   | 1  |   |    |    | 4   | 15  |
| <b>V210I</b>                     | 4  | 13  | 19 | 171 | 1  |   |    | 3  | 36  | 247 |
| <b>E211Q</b>                     |    | 5   | 2  | 3   |    |   |    | 1  |     | 11  |
| <b>E211D</b>                     |    | 1   |    |     |    |   |    |    |     | 1   |
| <b>Q212P</b>                     |    |     |    |     |    |   |    | 2  |     | 2   |
| <b>I215V</b>                     |    |     |    |     |    |   | 1  |    |     | 1   |
| <b>Y218N</b>                     |    |     |    |     |    |   | 1  |    |     | 1   |
| <b>A224V</b>                     |    |     |    |     |    |   |    |    | 1   | 1   |
| <b>Y226X</b>                     |    |     |    |     |    | 1 |    |    |     | 1   |
| <b>Q227X</b>                     |    |     |    |     |    | 1 |    |    |     | 1   |
| <b>M232R</b>                     |    |     |    |     | 63 |   |    |    |     | 63  |
| <b>V180I trans<br/>M232R</b>     |    |     |    |     | 4  |   |    |    |     | 4   |
| <b>Variant not<br/>specified</b> | 5  |     | 5  |     | 2  |   |    |    |     | 12  |

122  
123  
124

125  
126  
127

**Table S2. Rare *PRNP* variants reported in peer-reviewed literature to cause prion disease**

| <b>Variant</b> | <b>First report</b>  | <b>See also</b>                     |
|----------------|----------------------|-------------------------------------|
| P39L           | Bernardi 2014 (23)   |                                     |
| 2-OPRD         | Beck 2001 (24)       | Capellari 2002 (25)                 |
| 1-OPRI         | Laplanche 1995 (26)  | Pietrini 2003 (27)                  |
| 2-OPRI         | Hill 2006 (28)       |                                     |
| 3-OPRI         | Nishida 2004 (29)    |                                     |
| 4-OPRI         | Laplanche 1995 (26)  | Campbell 1996 (30), Kaski 2011 (31) |
| 5-OPRI         | Goldfarb 1991 (32)   |                                     |
| 6-OPRI         | Owen 1990 (33)       | Mead 2006 (34)                      |
| 7-OPRI         | Goldfarb 1991 (32)   | Lewis 2003 (35)                     |
| 8-OPRI         | Goldfarb 1991 (32)   | Laplanche 1999 (36)                 |
| 9-OPRI         | Krasemann 1995 (37)  |                                     |
| 12-OPRI        | Kumar 2011 (38)      |                                     |
| P84S           | Jones 2014 (39)      |                                     |
| S97N           | Zheng 2008 (40)      |                                     |
| P102L          | Goldgaber 1989 (41)  | Hsiao 1989 (42)                     |
| P105L          | Yamada 1993 (43)     | Yamada 1999 (44)                    |
| P105S          | Tunnell 2008 (45)    |                                     |
| P105T          | Polymenidou 2011(46) |                                     |
| G114V          | Rodriguez 2005 (47)  | Liu 2010 (48)                       |
| A117V          | Tateishi 1990 (49)   | Hsiao 1991 (50)                     |
| 129insLGGLGGYV | Hinnell 2011 (51)    |                                     |
| G131V          | Panegyres 2001 (52)  | Jansen 2012 (53)                    |
| S132I          | Hilton 2009 (54)     |                                     |
| A133V          | Rowe 2007 (55)       |                                     |
| Y145X          | Kitamoto 1993 (56)   |                                     |
| R148H          | Krebs 2005 (1)       | Pastore 2005 (2)                    |
| Q160X          | Finckh 2000 (57)     | Jayadev 2011 (58)                   |

|            |                       |                                                  |
|------------|-----------------------|--------------------------------------------------|
| Y163X      | Revesz 2009 (59)      | Mead 2013 (60)                                   |
| D167G      | Bishop 2009 (61)      |                                                  |
| D167N      | Beck 2010 (22)        |                                                  |
| V176G      | Simpson 2013 (62)     |                                                  |
| D178Efs25X | Mastuzono 2013 (63)   |                                                  |
| D178N      | Goldfarb 1991 (64)    | Medori 1992 (65), Goldfarb 1992 (66)             |
| V180I      | Hitoshi 1993 (67)     | Chasseigneaux 2006 (68)                          |
| T183A      | Nitrini 1997 (17)     | Grasbon-Frodl 2004 (69)                          |
| H187R      | Butefisch 2000 (70)   |                                                  |
| T188A      | Collins 2000 (71)     |                                                  |
| T188K      | Finckh 2000 (57)      | Roeber 2008 (4)                                  |
| T188R      | Windl 1999 (3)        | Roeber 2008 (4), Tartaglia 2010 (5)              |
| T193I      | Kotta 2006 (72)       |                                                  |
| E196A      | Zhang 2014 (73)       |                                                  |
| E196K      | Peoc'h 2000 (6)       |                                                  |
| F198S      | Farlow 1989 (74)      | Hsiao 1992 (18)                                  |
| F198V      | Zheng 2008 (40)       |                                                  |
| E200G      | Kim 2013 (75)         |                                                  |
| E200K      | Goldgaber 1989 (41)   | Hsiao 1991 (76)                                  |
| D202G      | Heinemann 2008 (77)   |                                                  |
| D202N      | Piccardo 1998 (78)    |                                                  |
| V203I      | Peoc'h 2000 (6)       |                                                  |
| R208C      | Zheng 2008 (40)       |                                                  |
| R208H      | Mastrianni 1996 (79)  | Capellari 2005 (11), Roeber 2005 (12)            |
| V210I      | Ripoll 1993 (80)      | Pocchiarri 1993 (81), Mouillet-Richard 1999 (82) |
| E211D      | Peoc'h 2012 (83)      |                                                  |
| E211Q      | Peoc'h 2000 (6)       |                                                  |
| Q212P      | Piccardo 1998 (78)    |                                                  |
| I215V      | Munoz-Nieto 2013 (84) |                                                  |
| Q217R      | Hsiao 1992 (18)       |                                                  |
| Y218N      | Alzualde 2010 (85)    |                                                  |



|       |                        |                 |
|-------|------------------------|-----------------|
| Y226X | Jansen 2010 (86)       |                 |
| Q227X | Jansen 2010 (86)       |                 |
| M232R | Hitoshi 1993 (67)      | Hoque 1996 (87) |
| M232T | Bratosiewicz 2000 (88) |                 |
| P238S | Windl 1999 (3)         |                 |

128  
129

130 **Table S3. Allele counts of rare *PRNP* variants in 60,706 individuals in**  
131 **ExAC.**

132 Chromosomal positions are given in GRCh37 coordinates and HGVS notations are given  
133 relative to Ensembl transcript ENST00000379440. Mean read depth across the *PRNP* coding  
134 sequence was 55.21. Call rate is the proportion of ExAC individuals with a genotype call of  
135 genotype quality (GQ)  $\geq 20$  and a depth (DP) of  $\geq 10$  reads.  
136

| Chrom | Pos     | Ref | Alt | HGVS     | Variant | Class      | Call rate | AC |
|-------|---------|-----|-----|----------|---------|------------|-----------|----|
| 20    | 4679863 | C   | T   | c.-4C>T  |         | non-coding | 97%       | 1  |
| 20    | 4679871 | C   | T   | c.5C>T   | A2V     | missense   | 97%       | 2  |
| 20    | 4679877 | T   | A   | c.11T>A  | L4H     | missense   | 98%       | 3  |
| 20    | 4679877 | T   | G   | c.11T>G  | L4R     | missense   | 98%       | 1  |
| 20    | 4679888 | A   | G   | c.22A>G  | M8V     | missense   | 98%       | 1  |
| 20    | 4679901 | T   | C   | c.35T>C  | F12S    | missense   | 98%       | 1  |
| 20    | 4679916 | G   | C   | c.50G>C  | S17T    | missense   | 98%       | 10 |
| 20    | 4679920 | C   | A   | c.54C>A  | D18E    | missense   | 98%       | 2  |
| 20    | 4679920 | C   | T   | c.54C>T  | D18D    | synonymous | 98%       | 18 |
| 20    | 4679927 | C   | A   | c.61C>A  | L21I    | missense   | 98%       | 1  |
| 20    | 4679932 | C   | T   | c.66C>T  | C22C    | synonymous | 98%       | 2  |
| 20    | 4679935 | G   | A   | c.69G>A  | K23K    | synonymous | 98%       | 2  |
| 20    | 4679939 | C   | T   | c.73C>T  | R25C    | missense   | 98%       | 2  |
| 20    | 4679944 | G   | A   | c.78G>A  | P26P    | synonymous | 98%       | 6  |
| 20    | 4679967 | G   | T   | c.101G>T | G34V    | missense   | 98%       | 1  |
| 20    | 4679969 | G   | A   | c.103G>A | G35S    | missense   | 98%       | 1  |

|    |         |   |   |          |       |            |      |    |
|----|---------|---|---|----------|-------|------------|------|----|
| 20 | 4679975 | C | T | c.109C>T | R37X  | nonsense   | 98%  | 1  |
| 20 | 4679982 | C | T | c.116C>T | P39L  | missense   | 98%  | 3  |
| 20 | 4679983 | G | A | c.117G>A | P39P  | synonymous | 98%  | 8  |
| 20 | 4679986 | G | A | c.120G>A | G40G  | synonymous | 98%  | 12 |
| 20 | 4680005 | A | G | c.139A>G | N47D  | missense   | 98%  | 1  |
| 20 | 4680026 | G | A | c.160G>A | G54S  | missense   | 97%  | 78 |
| 20 | 4680028 | T | C | c.162T>C | G54G  | synonymous | 97%  | 5  |
| 20 | 4680038 | G | T | c.172G>T | G58W  | missense   | 97%  | 1  |
| 20 | 4680045 | C | T | c.179C>T | P60L  | missense   | 96%  | 1  |
| 20 | 4680055 | T | A | c.189T>A | G63G  | synonymous | 96%  | 1  |
| 20 | 4680077 | G | A | c.211G>A | G71S  | missense   | 96%  | 1  |
| 20 | 4680089 | C | T | c.223C>T | Q75X  | nonsense   | 96%  | 1  |
| 20 | 4680091 | G | A | c.225G>A | Q75Q  | synonymous | 96%  | 2  |
| 20 | 4680093 | C | G | c.227C>G | P76R  | missense   | 96%  | 1  |
| 20 | 4680129 | G | C | c.263G>C | G88A  | missense   | 98%  | 1  |
| 20 | 4680134 | G | A | c.268G>A | G90S  | missense   | 98%  | 1  |
| 20 | 4680145 | T | G | c.279T>G | G93G  | synonymous | 99%  | 1  |
| 20 | 4680151 | C | T | c.285C>T | T95T  | synonymous | 99%  | 1  |
| 20 | 4680172 | G | A | c.306G>A | P102P | synonymous | 99%  | 21 |
| 20 | 4680185 | A | G | c.319A>G | T107A | missense   | 99%  | 1  |
| 20 | 4680199 | C | T | c.333C>T | H111H | synonymous | 99%  | 2  |
| 20 | 4680202 | G | A | c.336G>A | M112I | missense   | 99%  | 1  |
| 20 | 4680231 | T | G | c.365T>G | V122G | missense   | 99%  | 1  |
| 20 | 4680232 | G | T | c.366G>T | V122V | synonymous | 99%  | 3  |
| 20 | 4680244 | C | A | c.378C>A | G126G | synonymous | 99%  | 1  |
| 20 | 4680244 | C | T | c.378C>T | G126G | synonymous | 99%  | 3  |
| 20 | 4680250 | C | T | c.384C>T | Y128Y | synonymous | 100% | 22 |
| 20 | 4680252 | T | C | c.386T>C | M129T | missense   | 100% | 1  |

|    |         |   |   |          |       |            |      |   |
|----|---------|---|---|----------|-------|------------|------|---|
| 20 | 4680257 | G | T | c.391G>T | G131X | nonsense   | 100% | 1 |
| 20 | 4680258 | G | T | c.392G>T | G131V | missense   | 100% | 1 |
| 20 | 4680259 | A | G | c.393A>G | G131G | synonymous | 100% | 3 |
| 20 | 4680262 | T | C | c.396T>C | S132S | synonymous | 100% | 1 |
| 20 | 4680274 | G | A | c.408G>A | R136R | synonymous | 100% | 2 |
| 20 | 4680274 | G | T | c.408G>T | R136S | missense   | 100% | 2 |
| 20 | 4680279 | T | C | c.413T>C | I138T | missense   | 100% | 1 |
| 20 | 4680289 | C | T | c.423C>T | F141F | synonymous | 100% | 2 |
| 20 | 4680292 | C | T | c.426C>T | G142G | synonymous | 100% | 1 |
| 20 | 4680299 | T | G | c.433T>G | Y145D | missense   | 100% | 1 |
| 20 | 4680308 | C | T | c.442C>T | R148C | missense   | 100% | 1 |
| 20 | 4680309 | G | A | c.443G>A | R148H | missense   | 100% | 3 |
| 20 | 4680311 | T | C | c.445T>C | Y149H | missense   | 100% | 1 |
| 20 | 4680316 | T | C | c.450T>C | Y150Y | synonymous | 100% | 1 |
| 20 | 4680317 | C | T | c.451C>T | R151C | missense   | 100% | 2 |
| 20 | 4680318 | G | A | c.452G>A | R151H | missense   | 100% | 3 |
| 20 | 4680324 | A | G | c.458A>G | N153S | missense   | 100% | 1 |
| 20 | 4680328 | G | A | c.462G>A | M154I | missense   | 100% | 1 |
| 20 | 4680342 | A | G | c.476A>G | N159S | missense   | 100% | 1 |
| 20 | 4680349 | G | A | c.483G>A | V161V | synonymous | 100% | 1 |
| 20 | 4680359 | C | T | c.493C>T | P165S | missense   | 100% | 2 |
| 20 | 4680362 | A | G | c.496A>G | M166V | missense   | 100% | 2 |
| 20 | 4680364 | G | A | c.498G>A | M166I | missense   | 100% | 2 |
| 20 | 4680373 | C | T | c.507C>T | Y169Y | synonymous | 100% | 1 |
| 20 | 4680382 | G | A | c.516G>A | Q172Q | synonymous | 100% | 1 |
| 20 | 4680385 | C | T | c.519C>T | N173N | synonymous | 100% | 5 |
| 20 | 4680394 | G | A | c.528G>A | V176V | synonymous | 100% | 2 |
| 20 | 4680397 | C | G | c.531C>G | H177Q | missense   | 100% | 1 |

|    |         |   |   |          |       |            |      |    |
|----|---------|---|---|----------|-------|------------|------|----|
| 20 | 4680397 | C | T | c.531C>T | H177H | synonymous | 100% | 4  |
| 20 | 4680403 | C | T | c.537C>T | C179C | synonymous | 100% | 1  |
| 20 | 4680404 | G | A | c.538G>A | V180I | missense   | 100% | 6  |
| 20 | 4680412 | C | G | c.546C>G | I182M | missense   | 100% | 2  |
| 20 | 4680429 | C | G | c.563C>G | T188R | missense   | 100% | 3  |
| 20 | 4680429 | C | T | c.563C>T | T188M | missense   | 100% | 4  |
| 20 | 4680443 | A | G | c.577A>G | T193A | missense   | 100% | 2  |
| 20 | 4680445 | C | A | c.579C>A | T193T | synonymous | 100% | 1  |
| 20 | 4680449 | G | C | c.583G>C | G195R | missense   | 100% | 3  |
| 20 | 4680451 | G | A | c.585G>A | G195G | synonymous | 100% | 3  |
| 20 | 4680453 | A | C | c.587A>C | E196A | missense   | 100% | 9  |
| 20 | 4680462 | C | A | c.596C>A | T199N | missense   | 100% | 1  |
| 20 | 4680463 | C | T | c.597C>T | T199T | synonymous | 100% | 2  |
| 20 | 4680467 | A | T | c.601A>T | T201S | missense   | 100% | 1  |
| 20 | 4680469 | C | T | c.603C>T | T201T | synonymous | 100% | 3  |
| 20 | 4680470 | G | A | c.604G>A | D202N | missense   | 100% | 1  |
| 20 | 4680472 | C | T | c.606C>T | D202D | synonymous | 100% | 8  |
| 20 | 4680473 | G | A | c.607G>A | V203I | missense   | 100% | 3  |
| 20 | 4680488 | C | T | c.622C>T | R208C | missense   | 100% | 1  |
| 20 | 4680489 | G | A | c.623G>A | R208H | missense   | 100% | 9  |
| 20 | 4680490 | C | T | c.624C>T | R208R | synonymous | 100% | 4  |
| 20 | 4680491 | G | A | c.625G>A | V209M | missense   | 100% | 1  |
| 20 | 4680494 | G | A | c.628G>A | V210I | missense   | 100% | 2  |
| 20 | 4680501 | A | C | c.635A>C | Q212P | missense   | 100% | 1  |
| 20 | 4680502 | G | A | c.636G>A | Q212Q | synonymous | 100% | 2  |
| 20 | 4680520 | C | T | c.654C>T | Y218Y | synonymous | 100% | 17 |
| 20 | 4680534 | A | T | c.668A>T | Q223L | missense   | 100% | 1  |
| 20 | 4680539 | T | C | c.673T>C | Y225H | missense   | 99%  | 1  |

|    |         |   |   |          |       |              |     |    |
|----|---------|---|---|----------|-------|--------------|-----|----|
| 20 | 4680540 | A | G | c.674A>G | Y225C | missense     | 99% | 1  |
| 20 | 4680541 | T | C | c.675T>C | Y225Y | synonymous   | 99% | 3  |
| 20 | 4680552 | G | A | c.686G>A | G229E | missense     | 98% | 1  |
| 20 | 4680553 | A | G | c.687A>G | G229G | synonymous   | 98% | 1  |
| 20 | 4680561 | T | G | c.695T>G | M232R | missense     | 97% | 10 |
| 20 | 4680566 | C | T | c.700C>T | L234F | missense     | 95% | 29 |
| 20 | 4680590 | C | T | c.724C>T | L242F | missense     | 87% | 1  |
| 20 | 4680598 | C | G | c.732C>G | I244M | missense     | 84% | 1  |
| 20 | 4680598 | C | T | c.732C>T | I244I | synonymous   | 84% | 1  |
| 20 | 4680626 | T | G | c.760T>G | X254G | read-through | 66% | 1  |

137

138 **Table S4. Summary of rare *PRNP* variants by functional class in ExAC**

139

| Class        | Total AC |
|--------------|----------|
| missense     | 236      |
| non-coding   | 1        |
| nonsense     | 3        |
| read-through | 1        |
| synonymous   | 180      |

140

141 **Table S5. Allele counts of 16 reportedly pathogenic *PRNP* variants in**  
 142 **>500,000 23andMe research participants.**

143 To protect the privacy of 23andMe research participants, allele count (AC) values between 1  
 144 and 5 inclusive are displayed as "1-5" and are rounded up to 5 for the purposes of plotting.

145 These alleles were seen almost exclusively in a heterozygous state, with fewer than 5  
 146 homozygous individuals total across all 16 variants.

147

| Variant | dbSNP id   | 23andMe id | Called genotypes | AC  | Comments |
|---------|------------|------------|------------------|-----|----------|
| P102L   | rs74315401 | i5004359   | 502075           | 1-5 |          |

|       |            |            |        |           |                                                         |
|-------|------------|------------|--------|-----------|---------------------------------------------------------|
| A117V | rs74315402 | i5004358   | 501820 | total     |                                                         |
| D178N | rs74315403 | i5004357   | 502450 |           |                                                         |
| E200K | rs28933385 | rs28933385 | 531370 |           |                                                         |
| M232R | rs74315409 | i5004352   | 502475 | 78        | AC=29 in 2,685 individuals with >90% Japanese ancestry  |
| V180I | rs74315408 | i5004353   | 502125 | 15        | AC=1-5 in 2,670 individuals with >90% Japanese ancestry |
| V210I | rs74315407 | i5004354   | 502290 | 13        | AC=8 in 385,030 Europeans                               |
| R208C | rs55826236 | rs55826236 | 501850 | 8         |                                                         |
| R208H | rs74315412 | i5004349   | 501775 | 22        | AC=19 in 384,645 Europeans                              |
| P105L | rs11538758 | rs11538758 | 531575 | 1-5 total |                                                         |
| G131V | rs74315410 | i5004351   | 499455 |           |                                                         |
| A133V | rs74315415 | i5004347   | 502520 |           |                                                         |
| T183A | rs74315411 | i5004350   | 502295 |           |                                                         |
| F198V | rs55871421 | rs55871421 | 501540 |           |                                                         |
| F198S | rs74315405 | i5004356   | 502460 |           |                                                         |
| G217R | rs74315406 | i5004355   | 502385 |           |                                                         |

148

149

150

151 **Table S6. Phenotypes investigated in studies in which ExAC**  
 152 **individuals with reportedly pathogenic *PRNP* variants were**  
 153 **ascertained.**

154 Note that we do not have access to phenotypic data to indicate whether a particular individual  
 155 was ascertained as a case or a control. Therefore “cardiovascular” simply means an individual  
 156 was ascertained in a cardiovascular disease cohort, not necessarily that the individual has  
 157 cardiovascular disease. “Mixed” cohorts include controls, cardiovascular and pulmonary  
 158 phenotypes.  
 159

| Cohort phenotype    | Total in ExAC | Number with reportedly pathogenic <i>PRNP</i> variants |
|---------------------|---------------|--------------------------------------------------------|
| Autoimmune          | 1675          | 4                                                      |
| Cancer              | 7601          | 3                                                      |
| Cardiovascular      | 14622         | 14                                                     |
| Metabolic           | 15327         | 19                                                     |
| Mixed               | 3936          | 2                                                      |
| Population controls | 2215          | 6                                                      |
| Psychiatric         | 15330         | 4                                                      |
| <b>Total</b>        | <b>60706</b>  | <b>52</b>                                              |

160  
 161

162 **Table S7. Inferred ancestry and codon 129 genotypes of ExAC**  
 163 **individuals with reportedly pathogenic variants.**

164 Three-letter HapMap ancestry codes are defined in Table S8.  
 165

| Variant | Populations         | Codon 129 genotypes |
|---------|---------------------|---------------------|
| P39L    | 1 PJL, 2 TSI        | 2 M/M, 1 M/V        |
| G131V   | 1 TSI               | 1 M/V               |
| R148H   | 1 CEU, 1 IBS, 1 PJL | 3 M/M               |
| V180I   | 1 CHB, 2 JPT, 3 PJL | 4 M/M, 1 M/V, 1 V/V |
| T188R   | 1 CLM, 2 MXL        | 1 M/V, 2 V/V        |

|       |                                          |              |
|-------|------------------------------------------|--------------|
| E196A | 3 CHB, 6 CHS                             | 9 M/M        |
| D202N | 1 TSI                                    | 1 M/V        |
| V203I | 1 IBS, 2 TSI                             | 1 M/M, 2 M/V |
| R208C | 1 ACB                                    | 1 M/M        |
| R208H | 1 ACB, 2 ASW, 1 CLM, 2 IBS, 1 MSL, 2 TSI | 4 M/M, 5 M/V |
| V210I | 2 TSI                                    | 2 M/M        |
| Q212P | 1 CEU                                    | 1 M/V        |
| M232R | 5 CHB, 5 JPT                             | 10 M/M       |

166  
167

168 **Table S8. Inferred ancestry of all ExAC individuals.**  
169 Methods for ancestry assignment are described in Materials and Methods.  
170

| Population code | Description                                                       | Super population | N in ExAC |
|-----------------|-------------------------------------------------------------------|------------------|-----------|
| ACB             | African Caribbeans in Barbados                                    | AFR              | 2267      |
| ASW             | Americans of African Ancestry in SW USA                           | AFR              | 2151      |
| BEB             | Bengali from Bangladesh                                           | SAS              | 483       |
| CDX             | Chinese Dai in Xishuangbanna, China                               | EAS              | 19        |
| CEU             | Utah Residents (CEPH) with Northern and Western European ancestry | EUR              | 14185     |
| CHB             | Han Chinese in Beijing, China                                     | EAS              | 1553      |
| CHS             | Southern Han Chinese                                              | EAS              | 1733      |
| CLM             | Colombians from Medellin, Colombia                                | AMR              | 870       |
| ESN             | Esan in Nigeria                                                   | AFR              | 89        |
| FIN             | Finnish in Finland                                                | EUR              | 3977      |
| GBR             | British in England and Scotland                                   | EUR              | 10358     |
| GIH             | Gujarati Indian from Houston, Texas                               | SAS              | 79        |
| GWD             | Gambian in Western Divisions in The Gambia                        | AFR              | 102       |
| IBS             | Iberian population in Spain                                       | EUR              | 3534      |



|     |                                       |     |      |
|-----|---------------------------------------|-----|------|
| ITU | Indian Telugu from the UK             | SAS | 1089 |
| JPT | Japanese in Tokyo, Japan              | EAS | 663  |
| KHV | Kinh in Ho Chi Minh City, Vietnam     | EAS | 369  |
| LWK | Luhya in Webuye, Kenya                | AFR | 72   |
| MSL | Mende in Sierra Leone                 | AFR | 189  |
| MXL | Mexican Ancestry from Los Angeles USA | AMR | 2658 |
| PEL | Peruvians from Lima, Peru             | AMR | 1900 |
| PJL | Punjabi from Lahore, Pakistan         | SAS | 6300 |
| PUR | Puerto Ricans from Puerto Rico        | AMR | 579  |
| STU | Sri Lankan Tamil from the UK          | SAS | 460  |
| TSI | Toscani in Italia                     | EUR | 4795 |
| YRI | Yoruba in Ibadan, Nigeria             | AFR | 232  |

171  
172

173 **Table S9. Inferred ancestry of 23andMe research participants**

174

| <b>Ancestry</b> | <b>Minimum called genotypes</b> | <b>Maximum called genotypes</b> | <b>Total allele count of reportedly pathogenic <i>PRNP</i> variants</b> |
|-----------------|---------------------------------|---------------------------------|-------------------------------------------------------------------------|
| European        | 382865                          | 408475                          | ≥35                                                                     |
| Latino          | 42425                           | 44480                           | ≥10                                                                     |
| African         | 22945                           | 23795                           | ≥10                                                                     |
| East Asian      | 20255                           | 21710                           | ≥75                                                                     |
| All others      | 30975                           | 33125                           | ≥20                                                                     |
| <b>TOTAL</b>    | <b>499455</b>                   | <b>531575</b>                   | <b>141</b>                                                              |

175  
176  
177

178  
179

**Table S10. Details of Japanese prion disease cases**

| <b>Variant</b>     | <b>N</b> | <b>Male/Female</b> | <b>Age at onset*</b> | <b>(range)</b> | <b>Positive family history (%)</b> |
|--------------------|----------|--------------------|----------------------|----------------|------------------------------------|
| <b>Insertion</b>   | 8        | 4/4                | 51.0 ± 12.0          | (26-68)        | 5 (63)                             |
| <b>P102L</b>       | 83       | 38/45              | 55.5 ± 10.3          | (22-75)        | 69 (83)                            |
| <b>P105L</b>       | 12       | 7/5                | 46.9 ± 8.4           | (31-61)        | 11 (92)                            |
| <b>D178N-129M</b>  | 4        | 3/1                | 54.5 ± 5.5           | (46-61)        | None                               |
| <b>D178N-129V</b>  | 1        | 1/0                | 74                   |                | None                               |
| <b>V180I</b>       | 218      | 84/134             | 77.4 ± 6.8           | (44-93)        | 5 (2)                              |
| <b>E200K</b>       | 63       | 30/33              | 61.1 ± 9.9           | (31-83)        | 28 (44)                            |
| <b>V203I</b>       | 3        | 2/1                | 73                   |                | None                               |
| <b>R208H</b>       | 1        | 0/1                | 74                   |                | None                               |
| <b>V210I</b>       | 1        | 0/1                | 55                   |                | None                               |
| <b>M232R</b>       | 63       | 32/31              | 64.4 ± 10.9          | (15-82)        | 2 (3)                              |
| <b>V180I+M232R</b> | 4        | 2/2                | 71.3 ± 3.6           | (65-74)        | None                               |

180  
181

\*Age at onset is expressed as the mean ± SD (range) years.

| <b>Variant</b>    | <b>Duration**</b> | <b>(range)</b> | <b>Codon 129</b> | <b>Codon 219</b> |
|-------------------|-------------------|----------------|------------------|------------------|
| <b>Insertion</b>  | 27.8 ± 17.7       | (3-57)         | MM 6; MV 1       | EE 6; KK 1       |
| <b>P102L</b>      | 48.4 ± 35.8       | (2-186)        | MM 67; MV 6      | EE 70; EK 2      |
| <b>P105L</b>      | 90.2 ± 40.4       | (25-184)       | MV 11            | EE 7             |
| <b>D178N-129M</b> | 8.5 ± 4.4         | (2-13)         | MM 4             | EE 4             |
| <b>D178N-129V</b> | 24                |                | MV 1             | EE 1             |
| <b>V180I</b>      | 16.4 ± 14.5       | (0-70)         | MM 162; MV 54    | EE 210           |
| <b>E200K</b>      | 5.0 ± 6.0         | (1-32)         | MM 58; MV 3      | EE 58; EK 3      |
| <b>V203I</b>      | 3.7 ± 2.1         | (1-6)          | MM 3             | EE 3             |

|                    |             |        |             |             |
|--------------------|-------------|--------|-------------|-------------|
| <b>R208H</b>       | 3           |        | MM 1        | EE 1        |
| <b>V210I</b>       | 3           |        | MM 1        | EE 1        |
| <b>M232R</b>       | 8.6 ± 12.7  | (0-78) | MM 60; MV 2 | EE 61; EK 1 |
| <b>V180I+M232R</b> | 21.8 ± 17.7 | (1-47) | MM 4        | EE 4        |

182 \*\*Duration between the onset and akinetic mutism or death without akinetic mutism. Duration is  
183 expressed as the mean ± SD (range) months.

184

| <b>Variant</b>     | <b>PSWCs on EEG (%)</b> | <b>Hyperintensities on MRI (%)</b> | <b>Positive 14-3-3 protein (%)</b> |
|--------------------|-------------------------|------------------------------------|------------------------------------|
| <b>Insertion</b>   | 3/8 (38)                | 2/7 (29)                           | 0/1 (0)                            |
| <b>P102L</b>       | 11/72 (15)              | 32/76 (42)                         | 13/34 (38)                         |
| <b>P105L</b>       | 1/10 (10)               | 1/11 (9)                           | 1/2 (50)                           |
| <b>D178N-129M</b>  | 0/4 (0)                 | 1/4 (25)                           | 1/2 (50)                           |
| <b>D178N-129V</b>  | 0/1 (0)                 | 0/1 (0)                            | 1/1 (100)                          |
| <b>V180I</b>       | 19/203 (9)              | 212/213 (99)                       | 110/140 (79)                       |
| <b>E200K</b>       | 56/63 (89)              | 56/59 (95)                         | 29/31 (94)                         |
| <b>V203I</b>       | 3/3 (100)               | 2/2 (100)                          | 1/1 (100)                          |
| <b>R208H</b>       | 1/1 (100)               | 1/1 (100)                          | 1/1 (100)                          |
| <b>V210I</b>       | 1/1 (100)               | 1/1 (100)                          | not done                           |
| <b>M232R</b>       | 46/61 (75)              | 55/60 (92)                         | 31/43 (72)                         |
| <b>V180I+M232R</b> | 0/4 (0)                 | 4/4 (100)                          | 0/1 (0)                            |

185 EE = glutamic acid homozygosity; EK = glutamic acid/lysine heterozygosity; KK = lysine  
186 homozygosity; MM = methionine homozygosity; MV = methionine/valine heterozygosity; PSWCs  
187 = periodic synchronous wave complexes

188

189

190

191 **Table S11. Phenotypes of individuals with N-terminal PrP truncating**  
 192 **variants**

193

| HGVS        | Variant   | Zygoty | Sex | Age | Available phenotype information                                                                                                                                                                                                                                                                                                   |
|-------------|-----------|--------|-----|-----|-----------------------------------------------------------------------------------------------------------------------------------------------------------------------------------------------------------------------------------------------------------------------------------------------------------------------------------|
| c.59_60insC | G20Gfs84X | Het    | F   | 79  | Ascertained as part of the Rotterdam Study (89), a prospective cohort study of middle-aged and elderly persons. In good health and free of dementia as of at least age 78, at last in-person examination completion. Has 5 siblings and 2 children. Only family history noted is that one sibling has had a stroke before age 65. |
| c.109C>T    | R37X      | Het    | M   | 73  | Ascertained as a control for the Swedish schizophrenia study. Underwent heart bypass surgery in 2008, has a family history of heart problems. 4 siblings. Reports no family history of neurodegeneration or neuropathy.                                                                                                           |
| c.223C>T    | Q75X      | Het    | M   | 52  | Ascertained in a study of type 2 diabetes. Has mild type 2 diabetes treated with metformin. Has children.                                                                                                                                                                                                                         |
| c.391G>T    | G131X     | Het    | F   |     | None available.                                                                                                                                                                                                                                                                                                                   |

194

195

196

197 **Figure S1. Age of ExAC individuals with reportedly pathogenic PRNP**  
198 **variants versus all individuals in ExAC.**

199 The distribution of ages, available for 40 of 52 individuals with reportedly pathogenic PRNP  
200 variants, did not differ from the distribution overall ( $p = .69$ , Wilcoxon rank-sum test;  $p = .69$ ,  
201 student's t test) nor after controlling for cohort ( $p = .15$ , linear regression).

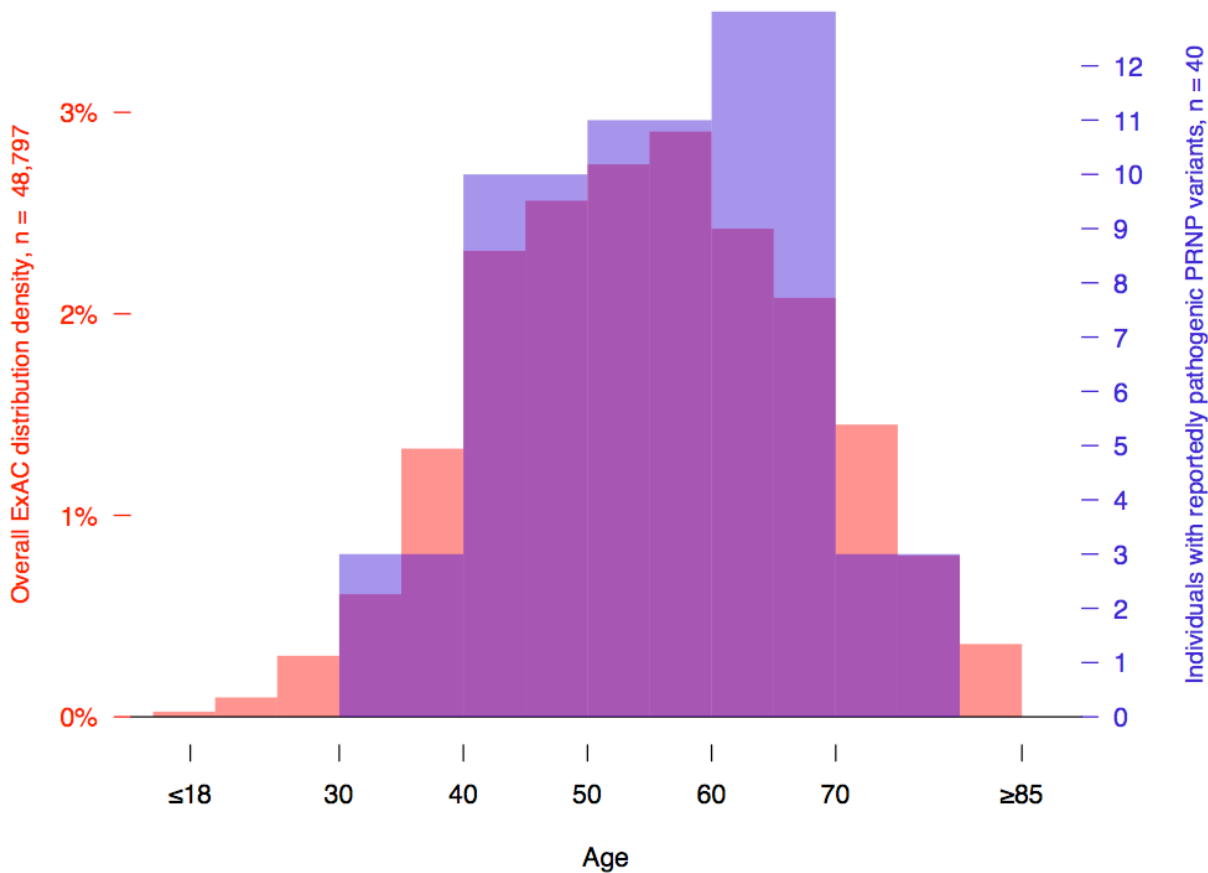

202  
203  
204  
205

206 **Figure S2. Sanger sequencing results for individuals with N-terminal**  
207 **truncating variants**

209 **Figure S2A. G20Gfs84X**

210 Reverse (top) and forward (bottom).

211 Primers: 2a-forward: AACTTAGGGTCACATTTGTCCTTGG; 2a-reverse:

212 GGTAACGGTGCATGTTTTACAG. 2b forward: GTGGTGGCTGGGGTCAAGG; 2b reverse:

213 TTTCCAGTGCCCATCAGTGC.

214

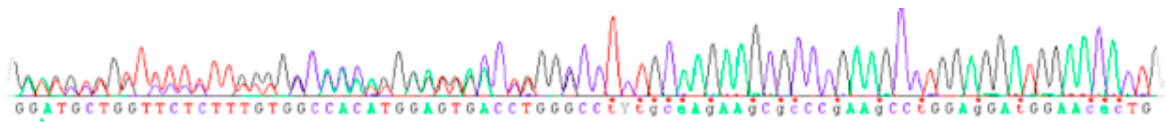

215

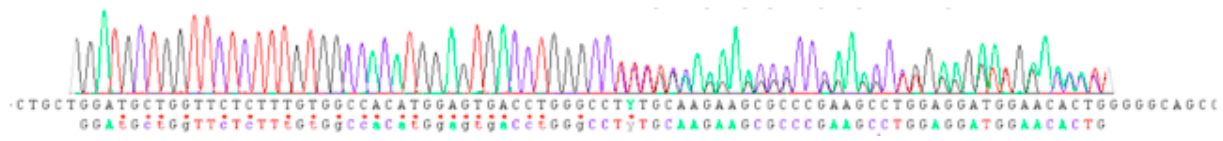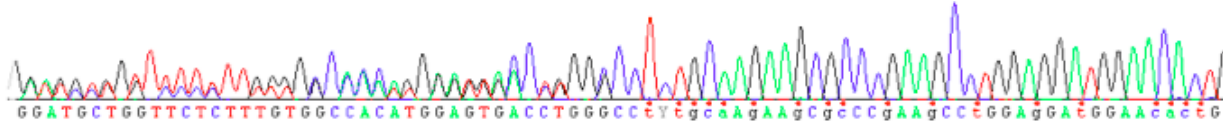

216

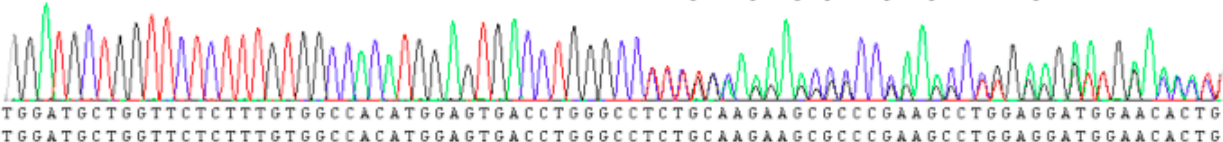

217

218

219 **Figure S2B. R37X**

220 DNA from whole blood (top) and fibroblasts (bottom).

221 Primers: PrP2-F: TGGGACTCTGACGTTCTCCT; PrP2-R: GGTGAAGTTCTCCCCCTTGG

222

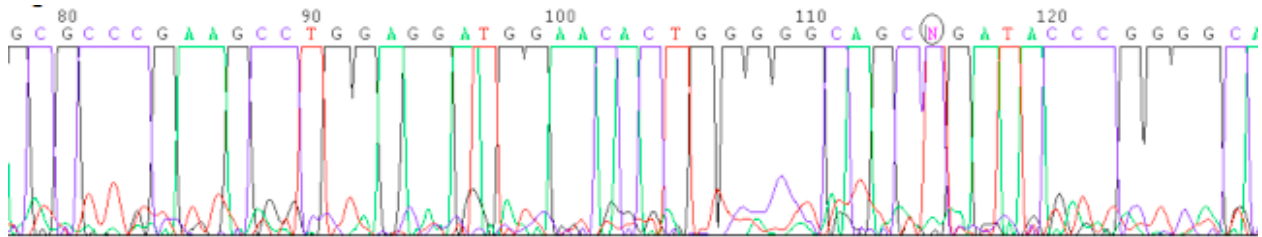

223

224

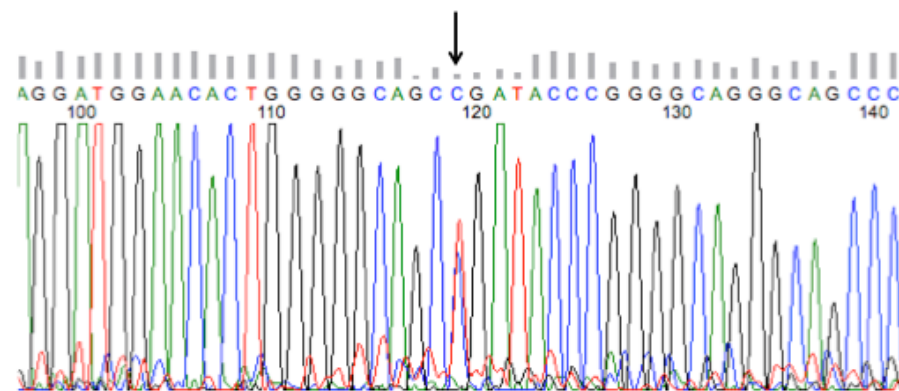

225

226

227 **Figure S2C. Q75X.**

228 Primers: PRNP\_EX2-M13-F [TGTAACGACGGCCAGT] CCATTGCTATGCACTCATTCA;

229 PRNP\_EX2-M13-R [CAGGAAACAGCTATGACC] CCATGTGCTTCATGTTGGTT

230

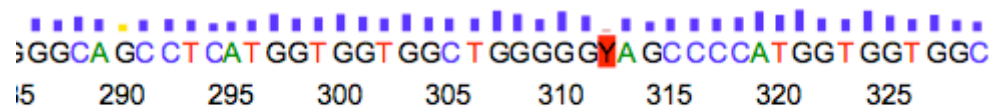

231

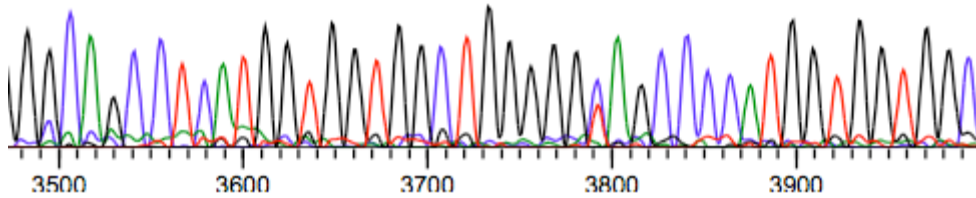

232

233 **Supplementary references**

234

235 1. B. Krebs, R.-M. Lederer, O. Windl, E.-M. Grasbon-Frodl, I. Zerr, H. A. Kretzschmar,  
236 Creutzfeldt-Jakob disease associated with an R148H mutation of the prion protein gene,  
237 *Neurogenetics* **6**, 97–100 (2005).

238 2. M. Pastore, S. S. Chin, K. L. Bell, Z. Dong, Q. Yang, L. Yang, J. Yuan, S. G. Chen, P.  
239 Gambetti, W.-Q. Zou, Creutzfeldt-Jakob disease (CJD) with a mutation at codon 148 of  
240 prion protein gene: relationship with sporadic CJD, *Am. J. Pathol.* **167**, 1729–1738  
241 (2005).

242 3. O. Windl, A. Giese, W. Schulz-Schaeffer, I. Zerr, K. Skworc, S. Arendt, C. Oberdieck,  
243 M. Bodemer, S. Poser, H. A. Kretzschmar, Molecular genetics of human prion diseases  
244 in Germany, *Hum. Genet.* **105**, 244–252 (1999).

245 4. S. Roeber, E.-M. Grasbon-Frodl, O. Windl, B. Krebs, W. Xiang, C. Vollmert, T. Illig, A.  
246 Schröter, T. Arzberger, P. Weber, I. Zerr, H. A. Kretzschmar, Evidence for a pathogenic  
247 role of different mutations at codon 188 of PRNP, *PLoS One* **3**, e2147 (2008).

248 5. M. C. Tartaglia, J. N. Thai, T. See, A. Kuo, R. Harbaugh, B. Raudabaugh, I. Cali, M.  
249 Sattavat, H. Sanchez, S. J. DeArmond, M. D. Geschwind, Pathologic evidence that the  
250 T188R mutation in PRNP is associated with prion disease, *J. Neuropathol. Exp. Neurol.*  
251 **69**, 1220–1227 (2010).

252 6. K. Peoc'h, P. Manivet, P. Beaudry, F. Attane, G. Besson, D. Hannequin, N.  
253 Delasnerie-Lauprêtre, J. L. Laplanche, Identification of three novel mutations (E196K,  
254 V203I, E211Q) in the prion protein gene (PRNP) in inherited prion diseases with  
255 Creutzfeldt-Jakob disease phenotype, *Hum. Mutat.* **15**, 482 (2000).

256 7. B.-H. Jeong, Y.-C. Jeon, Y.-J. Lee, H.-J. Cho, S.-J. Park, D.-I. Chung, J. Kim, S. H.  
257 Kim, H.-T. Kim, E.-K. Choi, K.-C. Choi, R. I. Carp, Y.-S. Kim, Creutzfeldt-Jakob disease  
258 with the V203I mutation and M129V polymorphism of the prion protein gene (PRNP)  
259 and a 17 kDa prion protein fragment, *Neuropathol. Appl. Neurobiol.* **36**, 558–563 (2010).

260 8. Q. Shi, C. Chen, X.-J. Wang, W. Zhou, J.-C. Wang, B.-Y. Zhang, C. Gao, C. Gao, J.  
261 Han, X.-P. Dong, Rare V203I mutation in the PRNP gene of a Chinese patient with  
262 Creutzfeldt-Jakob disease, *Prion* **7**, 259–262 (2013).

263 9. J. Komatsu, K. Sakai, T. Hamaguchi, Y. Sugiyama, K. Iwasa, M. Yamada,  
264 Creutzfeldt-Jakob disease associated with a V203I homozygous mutation in the prion  
265 protein gene, *Prion* **8**, 336–338 (2014).

266 10. J. A. Mastrianni, C. Iannicola, R. M. Myers, S. DeArmond, S. B. Prusiner, Mutation  
267 of the prion protein gene at codon 208 in familial Creutzfeldt-Jakob disease, *Neurology*  
268 **47**, 1305–1312 (1996).



- 269 11. S. Capellari, F. Cardone, S. Notari, M. E. Schininà, B. Maras, D. Sità, A. Baruzzi, M.  
270 Pocchiari, P. Parchi, Creutzfeldt-Jakob disease associated with the R208H mutation in  
271 the prion protein gene, *Neurology* **64**, 905–907 (2005).
- 272 12. S. Roeber, B. Krebs, M. Neumann, O. Windl, I. Zerr, E.-M. Grasbon-Frodl, H. A.  
273 Kretzschmar, Creutzfeldt-Jakob disease in a patient with an R208H mutation of the  
274 prion protein gene (PRNP) and a 17-kDa prion protein fragment, *Acta Neuropathol.*  
275 (*Berl.*) **109**, 443–448 (2005).
- 276 13. C. Basset-Leobon, E. Uro-Coste, K. Peoc'h, S. Haik, V. Sazdovitch, M. Rigal, O.  
277 Andreoletti, J.-J. Hauw, M.-B. Delisle, Familial Creutzfeldt-Jakob disease with an  
278 R208H-129V haplotype and Kuru plaques, *Arch. Neurol.* **63**, 449–452 (2006).
- 279 14. C. Chen, Q. Shi, C. Tian, Q. Li, W. Zhou, C. Gao, J. Han, X.-P. Dong, The first  
280 Chinese case of Creutzfeldt-Jakob disease patient with R208H mutation in PRNP, *Prion*  
281 **5**, 232–234 (2011).
- 282 15. R. Matěj, G. G. Kovacs, S. Johanidesová, J. Keller, M. Matějčková, J. Nováková, V.  
283 Sigut, O. Keller, R. Rusina, Genetic Creutzfeldt-Jakob disease with R208H mutation  
284 presenting as progressive supranuclear palsy, *Mov. Disord. Off. J. Mov. Disord. Soc.*  
285 **27**, 476–479 (2012).
- 286 16. M. G. Vita, S. Gaudino, D. Di Giuda, D. Sauchelli, P. E. Alboini, E. Gangemi, A.  
287 Bizzarro, E. Scaricamazza, S. Capellari, P. Parchi, C. Masullo, R208H-129VV haplotype  
288 in the prion protein gene: phenotype and neuroimaging of a patient with genetic  
289 Creutzfeldt-Jakob disease, *J. Neurol.* **260**, 2650–2652 (2013).
- 290 17. R. Nitrini, S. Rosemberg, M. R. Passos-Bueno, L. S. da Silva, P. Iughetti, M.  
291 Papadopoulos, P. M. Carrilho, P. Caramelli, S. Albrecht, M. Zatz, A. LeBlanc, Familial  
292 spongiform encephalopathy associated with a novel prion protein gene mutation, *Ann.*  
293 *Neurol.* **42**, 138–146 (1997).
- 294 18. K. Hsiao, S. R. Dlouhy, M. R. Farlow, C. Cass, M. Da Costa, P. M. Conneally, M. E.  
295 Hodes, B. Ghetti, S. B. Prusiner, Mutant prion proteins in Gerstmann-Sträussler-  
296 Scheinker disease with neurofibrillary tangles, *Nat. Genet.* **1**, 68–71 (1992).
- 297 19. D. G. MacArthur, T. A. Manolio, D. P. Dimmock, H. L. Rehm, J. Shendure, G. R.  
298 Abecasis, D. R. Adams, R. B. Altman, S. E. Antonarakis, E. A. Ashley, J. C. Barrett, L.  
299 G. Biesecker, D. F. Conrad, G. M. Cooper, N. J. Cox, M. J. Daly, M. B. Gerstein, D. B.  
300 Goldstein, J. N. Hirschhorn, S. M. Leal, L. A. Pennacchio, J. A. Stamatoyannopoulos, S.  
301 R. Sunyaev, D. Valle, B. F. Voight, W. Winckler, C. Gunter, Guidelines for investigating  
302 causality of sequence variants in human disease, *Nature* **508**, 469–476 (2014).
- 303 20. S. Richards, N. Aziz, S. Bale, D. Bick, S. Das, J. Gastier-Foster, W. W. Grody, M.  
304 Hegde, E. Lyon, E. Spector, K. Voelkerding, H. L. Rehm, ACMG Laboratory Quality  
305 Assurance Committee, Standards and guidelines for the interpretation of sequence  
306 variants: a joint consensus recommendation of the American College of Medical

- 307 Genetics and Genomics and the Association for Molecular Pathology, *Genet. Med. Off.*  
308 *J. Am. Coll. Med. Genet.* **17**, 405–424 (2015).
- 309 21. E. S. Simon, E. Kahana, J. Chapman, T. A. Treves, R. Gabizon, H. Rosenmann, N.  
310 Zilber, A. D. Korczyn, Creutzfeldt-Jakob disease profile in patients homozygous for the  
311 PRNP E200K mutation, *Ann. Neurol.* **47**, 257–260 (2000).
- 312 22. J. A. Beck, M. Poulter, T. A. Campbell, G. Adamson, J. B. Uphill, R. Guerreiro, G. S.  
313 Jackson, J. C. Stevens, H. Manji, J. Collinge, S. Mead, PRNP allelic series from 19  
314 years of prion protein gene sequencing at the MRC Prion Unit, *Hum. Mutat.* **31**, E1551–  
315 1563 (2010).
- 316 23. L. Bernardi, C. Cupidi, F. Frangipane, M. Anfossi, M. Gallo, M. E. Conidi, F. Vasso,  
317 R. Colao, G. Puccio, S. A. M. Curcio, M. Mirabelli, A. Clodomiro, R. Di Lorenzo, N.  
318 Smirne, R. Maletta, A. C. Bruni, Novel N-terminal domain mutation in prion protein  
319 detected in 2 patients diagnosed with frontotemporal lobar degeneration syndrome,  
320 *Neurobiol. Aging* **35**, 2657.e7–11 (2014).
- 321 24. J. A. Beck, S. Mead, T. A. Campbell, A. Dickinson, D. P. Wientjens, E. A. Croes, C.  
322 M. Van Duijn, J. Collinge, Two-octapeptide repeat deletion of prion protein associated  
323 with rapidly progressive dementia, *Neurology* **57**, 354–356 (2001).
- 324 25. S. Capellari, P. Parchi, B. D. Wolff, J. Campbell, R. Atkinson, D. M. Posey, R. B.  
325 Petersen, P. Gambetti, Creutzfeldt-Jakob disease associated with a deletion of two  
326 repeats in the prion protein gene, *Neurology* **59**, 1628–1630 (2002).
- 327 26. J. L. Laplanche, N. Delasnerie-Lauprêtre, J. P. Brandel, M. Dussaucy, J. Chatelain,  
328 J. M. Launay, Two novel insertions in the prion protein gene in patients with late-onset  
329 dementia, *Hum. Mol. Genet.* **4**, 1109–1111 (1995).
- 330 27. V. Pietrini, G. Puoti, L. Limido, G. Rossi, G. Di Fede, G. Giaccone, M. Mangieri, F.  
331 Tedeschi, A. Bondavalli, D. Mancina, O. Bugiani, F. Tagliavini, Creutzfeldt-Jakob disease  
332 with a novel extra-repeat insertional mutation in the PRNP gene, *Neurology* **61**, 1288–  
333 1291 (2003).
- 334 28. A. F. Hill, S. Joiner, J. A. Beck, T. A. Campbell, A. Dickinson, M. Poulter, J. D. F.  
335 Wadsworth, J. Collinge, Distinct glycoform ratios of protease resistant prion protein  
336 associated with PRNP point mutations, *Brain J. Neurol.* **129**, 676–685 (2006).
- 337 29. Y. Nishida, N. Sodeyama, Y. Toru, S. Toru, T. Kitamoto, H. Mizusawa, Creutzfeldt-  
338 Jakob disease with a novel insertion and codon 219 Lys/Lys polymorphism in PRNP,  
339 *Neurology* **63**, 1978–1979 (2004).
- 340 30. T. A. Campbell, M. S. Palmer, R. G. Will, W. R. Gibb, P. J. Luthert, J. Collinge, A  
341 prion disease with a novel 96-base pair insertional mutation in the prion protein gene,  
342 *Neurology* **46**, 761–766 (1996).

- 343 31. D. N. Kaski, C. Pennington, J. Beck, M. Poulter, J. Uphill, M. T. Bishop, J. M.  
344 Linehan, C. O'Malley, J. D. F. Wadsworth, S. Joiner, R. S. G. Knight, J. W. Ironside, S.  
345 Brandner, J. Collinge, S. Mead, Inherited prion disease with 4-octapeptide repeat  
346 insertion: disease requires the interaction of multiple genetic risk factors, *Brain J.*  
347 *Neurol.* **134**, 1829–1838 (2011).
- 348 32. L. G. Goldfarb, P. Brown, W. R. McCombie, D. Goldgaber, G. D. Swergold, P. R.  
349 Wills, L. Cervenakova, H. Baron, C. J. Gibbs, D. C. Gajdusek, Transmissible familial  
350 Creutzfeldt-Jakob disease associated with five, seven, and eight extra octapeptide  
351 coding repeats in the PRNP gene, *Proc. Natl. Acad. Sci. U. S. A.* **88**, 10926–10930  
352 (1991).
- 353 33. F. Owen, M. Poulter, T. Shah, J. Collinge, R. Lofthouse, H. Baker, R. Ridley, J.  
354 McVey, T. J. Crow, An in-frame insertion in the prion protein gene in familial Creutzfeldt-  
355 Jakob disease, *Brain Res. Mol. Brain Res.* **7**, 273–276 (1990).
- 356 34. S. Mead, M. Poulter, J. Beck, T. E. F. Webb, T. A. Campbell, J. M. Linehan, M.  
357 Desbruslais, S. Joiner, J. D. F. Wadsworth, A. King, P. Lantos, J. Collinge, Inherited  
358 prion disease with six octapeptide repeat insertional mutation--molecular analysis of  
359 phenotypic heterogeneity, *Brain J. Neurol.* **129**, 2297–2317 (2006).
- 360 35. V. Lewis, S. Collins, A. F. Hill, A. Boyd, C. A. McLean, M. Smith, C. L. Masters,  
361 Novel prion protein insert mutation associated with prolonged neurodegenerative  
362 illness, *Neurology* **60**, 1620–1624 (2003).
- 363 36. J. L. Laplanche, K. H. Hachimi, I. Durieux, P. Thuillet, L. Defebvre, N. Delasnerie-  
364 Lauprêtre, K. Peoc'h, J. F. Foncin, A. Destée, Prominent psychiatric features and early  
365 onset in an inherited prion disease with a new insertional mutation in the prion protein  
366 gene, *Brain J. Neurol.* **122 ( Pt 12)**, 2375–2386 (1999).
- 367 37. S. Krasemann, I. Zerr, T. Weber, S. Poser, H. Kretschmar, G. Hunsmann, W.  
368 Bodemer, Prion disease associated with a novel nine octapeptide repeat insertion in the  
369 PRNP gene, *Brain Res. Mol. Brain Res.* **34**, 173–176 (1995).
- 370 38. N. Kumar, B. F. Boeve, B. P. Boot, C. F. Orr, J. Duffy, B. K. Woodruff, A. K. Nair, J.  
371 Ellison, K. Kuntz, K. Kantarci, C. R. Jack, B. F. Westmoreland, J. A. Fields, M. Baker, R.  
372 Rademakers, J. E. Parisi, D. W. Dickson, Clinical characterization of a kindred with a  
373 novel 12-octapeptide repeat insertion in the prion protein gene, *Arch. Neurol.* **68**, 1165–  
374 1170 (2011).
- 375 39. M. Jones, S. Odunsi, D. du Plessis, A. Vincent, M. Bishop, M. W. Head, J. W.  
376 Ironside, D. Gow, Gerstmann-Straüssler-Scheinker disease: novel PRNP mutation and  
377 VGKC-complex antibodies, *Neurology* **82**, 2107–2111 (2014).
- 378 40. L. Zheng, J. Longfei, Y. Jing, Z. Xinqing, S. Haiqing, L. Haiyan, W. Fen, D. Xiumin,  
379 J. Jianping, PRNP mutations in a series of apparently sporadic neurodegenerative  
380 dementias in China, *Am. J. Med. Genet. Part B Neuropsychiatr. Genet. Off. Publ. Int.*  
381 *Soc. Psychiatr. Genet.* **147B**, 938–944 (2008).

- 382 41. D. Goldgaber, L. G. Goldfarb, P. Brown, D. M. Asher, W. T. Brown, S. Lin, J. W.  
383 Teener, S. M. Feinstone, R. Rubenstein, R. J. Kascsak, Mutations in familial  
384 Creutzfeldt-Jakob disease and Gerstmann-Sträussler-Scheinker's syndrome, *Exp.*  
385 *Neurol.* **106**, 204–206 (1989).
- 386 42. K. Hsiao, H. F. Baker, T. J. Crow, M. Poulter, F. Owen, J. D. Terwilliger, D.  
387 Westaway, J. Ott, S. B. Prusiner, Linkage of a prion protein missense variant to  
388 Gerstmann-Sträussler syndrome, *Nature* **338**, 342–345 (1989).
- 389 43. M. Yamada, Y. Itoh, H. Fujigasaki, S. Naruse, K. Kaneko, T. Kitamoto, J. Tateishi,  
390 E. Otomo, M. Hayakawa, J. Tanaka, A missense mutation at codon 105 with codon 129  
391 polymorphism of the prion protein gene in a new variant of Gerstmann-Sträussler-  
392 Scheinker disease, *Neurology* **43**, 2723–2724 (1993).
- 393 44. M. Yamada, Y. Itoh, A. Inaba, Y. Wada, M. Takashima, S. Satoh, T. Kamata, R.  
394 Okeda, T. Kayano, N. Suematsu, T. Kitamoto, E. Otomo, M. Matsushita, H. Mizusawa,  
395 An inherited prion disease with a PrP P105L mutation: clinicopathologic and PrP  
396 heterogeneity, *Neurology* **53**, 181–188 (1999).
- 397 45. E. Tunnell, R. Wollman, S. Mallik, C. J. Cortes, S. J. Dearmond, J. A. Mastrianni, A  
398 novel PRNP-P105S mutation associated with atypical prion disease and a rare PrPSc  
399 conformation, *Neurology* **71**, 1431–1438 (2008).
- 400 46. M. Polymenidou, S. Prokop, H. H. Jung, E. Hewer, D. Peretz, R. Moos, M. Tolnay,  
401 A. Aguzzi, Atypical prion protein conformation in familial prion disease with PRNP  
402 P105T mutation, *Brain Pathol. Zurich Switz.* **21**, 209–214 (2011).
- 403 47. M.-M. Rodriguez, K. Peoc'h, S. Haïk, C. Bouchet, L. Vernengo, G. Mañana, R.  
404 Salamano, L. Carrasco, M. Lenne, P. Beaudry, J.-M. Launay, J.-L. Laplanche, A novel  
405 mutation (G114V) in the prion protein gene in a family with inherited prion disease,  
406 *Neurology* **64**, 1455–1457 (2005).
- 407 48. Z. Liu, L. Jia, Y. Piao, D. Lu, F. Wang, H. Lv, Y. Lu, J. Jia, Creutzfeldt-Jakob disease  
408 with PRNP G114V mutation in a Chinese family, *Acta Neurol. Scand.* **121**, 377–383  
409 (2010).
- 410 49. J. Tateishi, T. Kitamoto, K. Doh-ura, Y. Sakaki, G. Steinmetz, C. Tranchant, J. M.  
411 Warter, N. Heldt, Immunochemical, molecular genetic, and transmission studies on a  
412 case of Gerstmann-Sträussler-Scheinker syndrome, *Neurology* **40**, 1578–1581 (1990).
- 413 50. K. K. Hsiao, C. Cass, G. D. Schellenberg, T. Bird, E. Devine-Gage, H. Wisniewski,  
414 S. B. Prusiner, A prion protein variant in a family with the telencephalic form of  
415 Gerstmann-Sträussler-Scheinker syndrome, *Neurology* **41**, 681–684 (1991).
- 416 51. C. Hinnell, M. B. Coulthart, G. H. Jansen, N. R. Cashman, J. Lauzon, A. Clark, F.  
417 Costello, C. White, R. Midha, S. Wiebe, S. Furtado, Gerstmann-Straussler-Scheinker  
418 disease due to a novel prion protein gene mutation, *Neurology* **76**, 485–487 (2011).

- 419 52. P. K. Panegyres, K. Toufexis, B. A. Kakulas, L. Cernevakova, P. Brown, B. Ghetti,  
420 P. Piccardo, S. R. Dlouhy, A new PRNP mutation (G131V) associated with Gerstmann-  
421 Sträussler-Scheinker disease, *Arch. Neurol.* **58**, 1899–1902 (2001).
- 422 53. C. Jansen, P. Parchi, S. Capellari, C. A. Ibrahim-Verbaas, M. Schuur, R.  
423 Strammiello, P. Corrado, M. T. Bishop, W. A. van Gool, M. M. Verbeek, F. Baas, W. van  
424 Saane, W. G. M. Spliet, G. H. Jansen, C. M. van Duijn, A. J. M. Rozemuller, Human  
425 prion diseases in the Netherlands (1998-2009): clinical, genetic and molecular aspects,  
426 *PloS One* **7**, e36333 (2012).
- 427 54. D. A. Hilton, M. W. Head, V. K. Singh, M. Bishop, J. W. Ironside, Familial prion  
428 disease with a novel serine to isoleucine mutation at codon 132 of prion protein gene  
429 (PRNP), *Neuropathol. Appl. Neurobiol.* **35**, 111–115 (2009).
- 430 55. D. B. Rowe, V. Lewis, M. Needham, M. Rodriguez, A. Boyd, C. McLean, H. Roberts,  
431 C. L. Masters, S. J. Collins, Novel prion protein gene mutation presenting with subacute  
432 PSP-like syndrome, *Neurology* **68**, 868–870 (2007).
- 433 56. T. Kitamoto, R. Iizuka, J. Tateishi, An amber mutation of prion protein in Gerstmann-  
434 Sträussler syndrome with mutant PrP plaques, *Biochem. Biophys. Res. Commun.* **192**,  
435 525–531 (1993).
- 436 57. U. Finckh, T. Müller-Thomsen, U. Mann, C. Eggers, J. Marksteiner, W. Meins, G.  
437 Binetti, A. Alberici, C. Hock, R. M. Nitsch, A. Gal, High prevalence of pathogenic  
438 mutations in patients with early-onset dementia detected by sequence analyses of four  
439 different genes, *Am. J. Hum. Genet.* **66**, 110–117 (2000).
- 440 58. S. Jayadev, D. Nochlin, P. Poorkaj, E. J. Steinbart, J. A. Mastrianni, T. J. Montine,  
441 B. Ghetti, G. D. Schellenberg, T. D. Bird, J. B. Leverenz, Familial prion disease with  
442 Alzheimer disease-like tau pathology and clinical phenotype, *Ann. Neurol.* **69**, 712–720  
443 (2011).
- 444 59. T. Revesz, J. L. Holton, T. Lashley, G. Plant, B. Frangione, A. Rostagno, J. Ghiso,  
445 Genetics and molecular pathogenesis of sporadic and hereditary cerebral amyloid  
446 angiopathies, *Acta Neuropathol. (Berl.)* **118**, 115–130 (2009).
- 447 60. S. Mead, S. Gandhi, J. Beck, D. Caine, D. Gajulapalli, D. Gallujipali, C. Carswell, H.  
448 Hyare, S. Joiner, H. Ayling, T. Lashley, J. M. Linehan, H. Al-Doujaily, B. Sharps, T.  
449 Revesz, M. K. Sandberg, M. M. Reilly, M. Koltzenburg, A. Forbes, P. Rudge, S.  
450 Brandner, J. D. Warren, J. D. F. Wadsworth, N. W. Wood, J. L. Holton, J. Collinge, A  
451 novel prion disease associated with diarrhea and autonomic neuropathy, *N. Engl. J.*  
452 *Med.* **369**, 1904–1914 (2013).
- 453 61. M. T. Bishop, C. Pennington, C. A. Heath, R. G. Will, R. S. G. Knight, PRNP  
454 variation in UK sporadic and variant Creutzfeldt Jakob disease highlights genetic risk  
455 factors and a novel non-synonymous polymorphism, *BMC Med. Genet.* **10**, 146 (2009).

- 456 62. M. Simpson, V. Johanssen, A. Boyd, G. Klug, C. L. Masters, Q.-X. Li, R. Pamphlett,  
457 C. McLean, V. Lewis, S. J. Collins, Unusual clinical and molecular-pathological profile of  
458 gerstmann-Sträussler-Scheinker disease associated with a novel PRNP mutation  
459 (V176G), *JAMA Neurol.* **70**, 1180–1185 (2013).
- 460 63. K. Matsuzono, Y. Ikeda, W. Liu, T. Kurata, S. Deguchi, K. Deguchi, K. Abe, A novel  
461 familial prion disease causing pan-autonomic-sensory neuropathy and cognitive  
462 impairment, *Eur. J. Neurol. Off. J. Eur. Fed. Neurol. Soc.* **20**, e67–69 (2013).
- 463 64. L. G. Goldfarb, M. Haltia, P. Brown, A. Nieto, J. Kovanen, W. R. McCombie, S.  
464 Trapp, D. C. Gajdusek, New mutation in scrapie amyloid precursor gene (at codon 178)  
465 in Finnish Creutzfeldt-Jakob kindred, *Lancet* **337**, 425 (1991).
- 466 65. R. Medori, H. J. Tritschler, A. LeBlanc, F. Villare, V. Manetto, H. Y. Chen, R. Xue, S.  
467 Leal, P. Montagna, P. Cortelli, Fatal familial insomnia, a prion disease with a mutation at  
468 codon 178 of the prion protein gene, *N. Engl. J. Med.* **326**, 444–449 (1992).
- 469 66. L. G. Goldfarb, R. B. Petersen, M. Tabaton, P. Brown, A. C. LeBlanc, P. Montagna,  
470 P. Cortelli, J. Julien, C. Vital, W. W. Pendelbury, Fatal familial insomnia and familial  
471 Creutzfeldt-Jakob disease: disease phenotype determined by a DNA polymorphism,  
472 *Science* **258**, 806–808 (1992).
- 473 67. S. Hitoshi, H. Nagura, H. Yamanouchi, T. Kitamoto, Double mutations at codon 180  
474 and codon 232 of the PRNP gene in an apparently sporadic case of Creutzfeldt-Jakob  
475 disease, *J. Neurol. Sci.* **120**, 208–212 (1993).
- 476 68. S. Chasseigneaux, S. Haïk, I. Laffont-Proust, O. De Marco, M. Lenne, J.-P. Brandel,  
477 J.-J. Hauw, J.-L. Laplanche, K. Peoc'h, V180I mutation of the prion protein gene  
478 associated with atypical PrPSc glycosylation, *Neurosci. Lett.* **408**, 165–169 (2006).
- 479 69. E. Grasbon-Frodl, H. Lorenz, U. Mann, R. M. Nitsch, O. Windl, H. A. Kretzschmar,  
480 Loss of glycosylation associated with the T183A mutation in human prion disease, *Acta*  
481 *Neuropathol. (Berl.)* **108**, 476–484 (2004).
- 482 70. C. M. Bütefisch, P. Gambetti, L. Cervenakova, K. Y. Park, M. Hallett, L. G. Goldfarb,  
483 Inherited prion encephalopathy associated with the novel PRNP H187R mutation: a  
484 clinical study, *Neurology* **55**, 517–522 (2000).
- 485 71. S. Collins, A. Boyd, A. Fletcher, K. Byron, C. Harper, C. A. McLean, C. L. Masters,  
486 Novel prion protein gene mutation in an octogenarian with Creutzfeldt-Jakob disease,  
487 *Arch. Neurol.* **57**, 1058–1063 (2000).
- 488 72. K. Kotta, I. Paspaltsis, S. Bostantjopoulou, H. Latsoudis, A. Plaitakis, D. Kazis, J.  
489 Collinge, T. Sklaviadis, Novel mutation of the PRNP gene of a clinical CJD case, *BMC*  
490 *Infect. Dis.* **6**, 169 (2006).

- 491 73. H. Zhang, M. Wang, L. Wu, H. Zhang, T. Jin, J. Wu, L. Sun, Novel prion protein  
492 gene mutation at codon 196 (E196A) in a septuagenarian with Creutzfeldt-Jakob  
493 disease, *J. Clin. Neurosci. Off. J. Neurosurg. Soc. Australas.* **21**, 175–178 (2014).
- 494 74. M. R. Farlow, R. D. Yee, S. R. Dlouhy, P. M. Conneally, B. Azzarelli, B. Ghetti,  
495 Gerstmann-Sträussler-Scheinker disease. I. Extending the clinical spectrum, *Neurology*  
496 **39**, 1446–1452 (1989).
- 497 75. M.-O. Kim, I. Cali, A. Oehler, J. C. Fong, K. Wong, T. See, J. S. Katz, P. Gambetti,  
498 B. M. Bettcher, S. J. Dearmond, M. D. Geschwind, Genetic CJD with a novel E200G  
499 mutation in the prion protein gene and comparison with E200K mutation cases, *Acta*  
500 *Neuropathol. Commun.* **1**, 80 (2013).
- 501 76. K. Hsiao, Z. Meiner, E. Kahana, C. Cass, I. Kahana, D. Avrahami, G. Scarlato, O.  
502 Abramsky, S. B. Prusiner, R. Gabizon, Mutation of the prion protein in Libyan Jews with  
503 Creutzfeldt-Jakob disease, *N. Engl. J. Med.* **324**, 1091–1097 (1991).
- 504 77. U. Heinemann, A. Krasnianski, B. Meissner, E. M. Grasbon-Frodl, H. A.  
505 Kretschmar, I. Zerr, Novel PRNP mutation in a patient with a slow progressive  
506 dementia syndrome, *Med. Sci. Monit. Int. Med. J. Exp. Clin. Res.* **14**, CS41–43 (2008).
- 507 78. P. Piccardo, S. R. Dlouhy, P. M. Lievens, K. Young, T. D. Bird, D. Nochlin, D. W.  
508 Dickson, H. V. Vinters, T. R. Zimmerman, I. R. Mackenzie, S. J. Kish, L. C. Ang, C. De  
509 Carli, M. Pocchiari, P. Brown, C. J. Gibbs, D. C. Gajdusek, O. Bugiani, J. Ironside, F.  
510 Tagliavini, B. Ghetti, Phenotypic variability of Gerstmann-Sträussler-Scheinker disease  
511 is associated with prion protein heterogeneity, *J. Neuropathol. Exp. Neurol.* **57**, 979–988  
512 (1998).
- 513 79. J. A. Mastrianni, C. Iannicola, R. M. Myers, S. DeArmond, S. B. Prusiner, Mutation  
514 of the prion protein gene at codon 208 in familial Creutzfeldt-Jakob disease, *Neurology*  
515 **47**, 1305–1312 (1996).
- 516 80. L. Ripoll, J. L. Laplanche, M. Salzmann, A. Jouvét, B. Planques, M. Dussaucy, J.  
517 Chatelain, P. Beaudry, J. M. Launay, A new point mutation in the prion protein gene at  
518 codon 210 in Creutzfeldt-Jakob disease, *Neurology* **43**, 1934–1938 (1993).
- 519 81. M. Pocchiari, M. Salvatore, F. Cutruzzolá, M. Genuardi, C. T. Alloatelli, C. Masullo,  
520 G. Macchi, G. Alemá, S. Galgani, Y. G. Xi, A new point mutation of the prion protein  
521 gene in Creutzfeldt-Jakob disease, *Ann. Neurol.* **34**, 802–807 (1993).
- 522 82. S. Mouillet-Richard, C. Teil, M. Lenne, S. Hugon, O. Taleb, J. L. Laplanche,  
523 Mutation at codon 210 (V210I) of the prion protein gene in a North African patient with  
524 Creutzfeldt-Jakob disease, *J. Neurol. Sci.* **168**, 141–144 (1999).
- 525 83. K. Peoc'h, E. Levavasseur, E. Delmont, A. De Simone, I. Laffont-Proust, N. Privat,  
526 Y. Chebaro, C. Chapuis, P. Bedoucha, J.-P. Brandel, A. Laquerriere, J.-L. Kemeny, J.-J.  
527 Hauw, M. Borg, H. Rezaei, P. Derreumaux, J.-L. Laplanche, S. Haïk, Substitutions at  
528 residue 211 in the prion protein drive a switch between CJD and GSS syndrome, a new

- 529 mechanism governing inherited neurodegenerative disorders, *Hum. Mol. Genet.* **21**,  
530 5417–5428 (2012).
- 531 84. M. Muñoz-Nieto, N. Ramonet, J. I. López-Gastón, N. Cuadrado-Corrales, O. Calero,  
532 M. Díaz-Hurtado, J. R. Ipiens, S. Ramón y Cajal, J. de Pedro-Cuesta, M. Calero, A  
533 novel mutation I215V in the PRNP gene associated with Creutzfeldt-Jakob and  
534 Alzheimer's diseases in three patients with divergent clinical phenotypes, *J. Neurol.*  
535 **260**, 77–84 (2013).
- 536 85. A. Alzualde, B. Indakoetxea, I. Ferrer, F. Moreno, M. Barandiaran, A. Gorostidi, A.  
537 Estanga, I. Ruiz, M. Calero, F. W. van Leeuwen, B. Atares, R. Juste, A. B. Rodriguez-  
538 Martínez, A. López de Munain, A novel PRNP Y218N mutation in Gerstmann-  
539 Sträussler-Scheinker disease with neurofibrillary degeneration, *J. Neuropathol. Exp.*  
540 *Neurol.* **69**, 789–800 (2010).
- 541 86. C. Jansen, P. Parchi, S. Capellari, A. J. Vermeij, P. Corrado, F. Baas, R.  
542 Strammiello, W. A. van Gool, J. C. van Swieten, A. J. M. Rozemuller, Prion protein  
543 amyloidosis with divergent phenotype associated with two novel nonsense mutations in  
544 PRNP, *Acta Neuropathol. (Berl.)* **119**, 189–197 (2010).
- 545 87. M. Z. Hoque, T. Kitamoto, H. Furukawa, T. Muramoto, J. Tateishi, Mutation in the  
546 prion protein gene at codon 232 in Japanese patients with Creutzfeldt-Jakob disease: a  
547 clinicopathological, immunohistochemical and transmission study, *Acta Neuropathol.*  
548 *(Berl.)* **92**, 441–446 (1996).
- 549 88. J. Bratosiewicz, M. Barcikowska, L. Cervenakowa, P. Brown, D. C. Gajdusek, P. P.  
550 Liberski, A new point mutation of the PRNP gene in Gerstmann-Sträussler-Scheinker  
551 case in Poland, *Folia Neuropathol. Assoc. Pol. Neuropathol. Med. Res. Cent. Pol. Acad.*  
552 *Sci.* **38**, 164–166 (2000).
- 553 89. A. Hofman, S. Darwish Murad, C. M. van Duijn, O. H. Franco, A. Goedegebure, M.  
554 A. Ikram, C. C. W. Klaver, T. E. C. Nijsten, R. P. Peeters, B. H. C. Stricker, H. W.  
555 Tiemeier, A. G. Uitterlinden, M. W. Vernooij, The Rotterdam Study: 2014 objectives and  
556 design update, *Eur. J. Epidemiol.* **28**, 889–926 (2013).

557
